# Supplementary material
Source: publisher figshare collection journal article supplement (https://tandf.figshare.com/articles/dataset/_/1427410)
Supplement: Supplementary file 1 [file 2]

Archive with 2 entries (2 files):
- M2014-0112 1017119 Supplement Video.mp4
- M2014-0112 1017119 Supplement Video Caption.pdf
