# Supplementary material
Source: publisher figshare collection journal article supplement (https://tandf.figshare.com/articles/dataset/_/1427410)
Supplement: Supplementary file 1 [file 2 › M2014-0112 1017119 Supplement Video Caption.pdf]

### **Supplement: Video of a DIDSON Transect**

Supplemental Video S.1. Video export of a typical DIDSON transect. This video displays many of the challenges inherent in tallying the number of sturgeon detected in a transect. Sturgeon number 1 is difficult to detect due to a lack of movement, and sturgeon reenter the field of view after being disturbed by the survey vessel. Sturgeon reentering the field of view were not tallied. Eight sturgeon were detected in this transect. At 0:35, sturgeon number 1 is visible near the right side of the screen, 20–22 m from the lens. At 0:41–0:43, sturgeon numbers 2 and 3 are visible near the middle of the screen, 14–18 m from the lens. At 0:47, sturgeon number 4 is just left of center, 14–16 m from the lens. Sturgeon number 5 is just right of center, 16–18 m from the lens. Sturgeon number 6 is on the very left edge of the screen, 16–18 m from the lens. At 0:52, sturgeon number 7 is near the right edge of the screen, 16–18 m from the lens. At 0:58, sturgeon number 8 is on the left side of the screen, 13–15 m from the lens.
